# Supplementary material
Source: ML conference proceedings conference paper supplement (https://openreview.net/forum?id=VN5bMTfSZS)
Supplement: supplementary_material [file Supplemental_Materials_For_NeurIPS_2025.pdf › Supplemental_Materials_For_NeurIPS_2025.pdf]

---

# OCTDiff: Bridged Diffusion Model for Portable OCT Super-Resolution and Enhancement

---

Anonymous Author(s)

Affiliation

Address

email

## 1 A Appendix

### 2 A.1 Additional Results

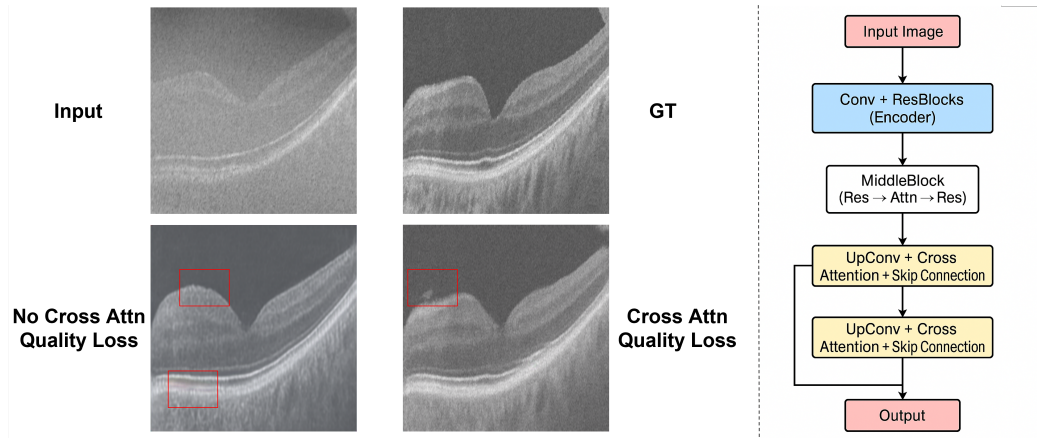

Figure 1: Example of an OCTDiff-generated image with and without the MSCA block. The loss function implemented contains the quality score term. Right side: a block depiction of MSCA.

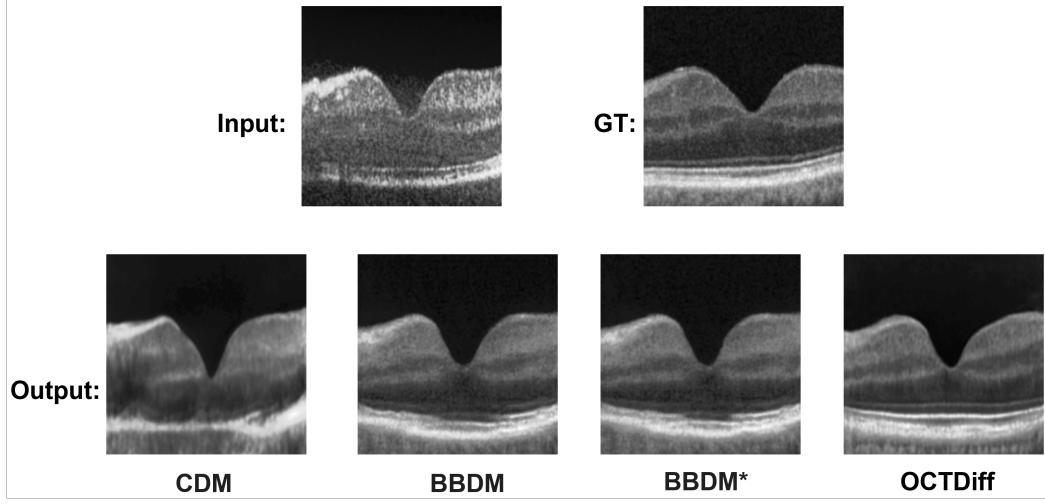

Figure 2: Another example comparing LDM, BBDM and OCTDiff outputs. The input image is normalized and histogram-matched with GT for better presentation. BBDM\*: the BBDM model implemented with exactly the same strategy and hyperparameters as OCTDiff (including learning rate, optimizer, batch size and quality-loss).

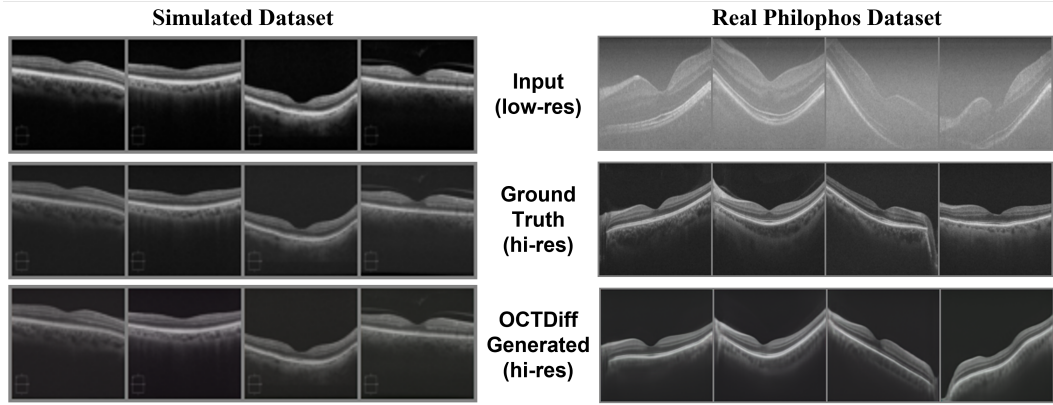

Figure 3: Results without doing image registration on the input low-resolution images, while the rest of the experiments are the same. Left: Results on Simulated Dataset; Right: Results on Philophos Dataset. From top to bottom rows: Input low-resolution images from portable OCT; Ground Truth high-resolution images from commercial OCT; OCTDiff generated images. Each row contains 4 independent examples for each dataset result.

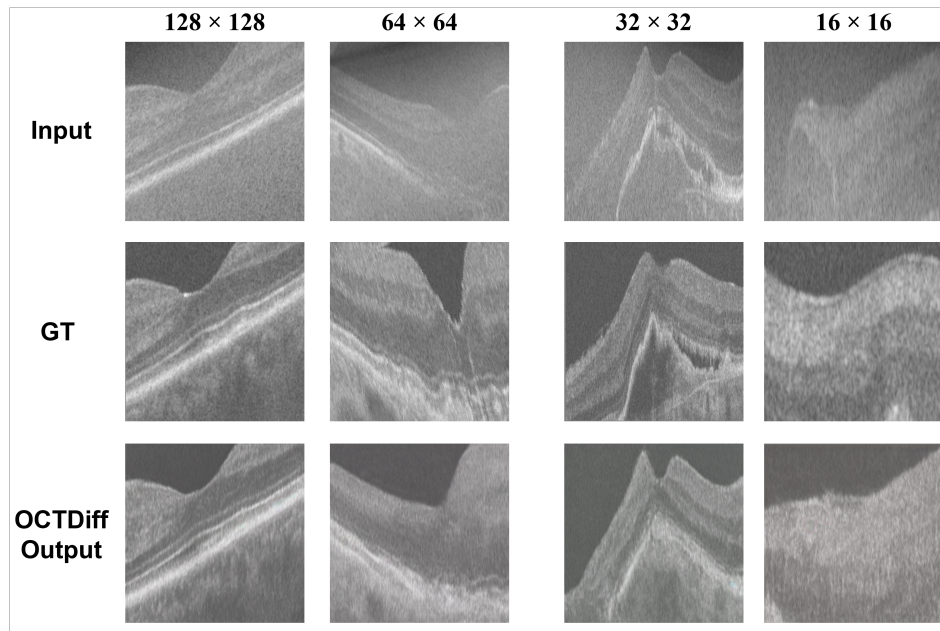

Figure 4: A set of generated image-patch examples using OCTDiff. From left to right: four image patches at resolutions of  $128 \times 128$ ,  $64 \times 64$ ,  $32 \times 32$ , and  $16 \times 16$ , respectively, revealing progressively more localized details.

### 3 A.2 Comparison of Generative Models

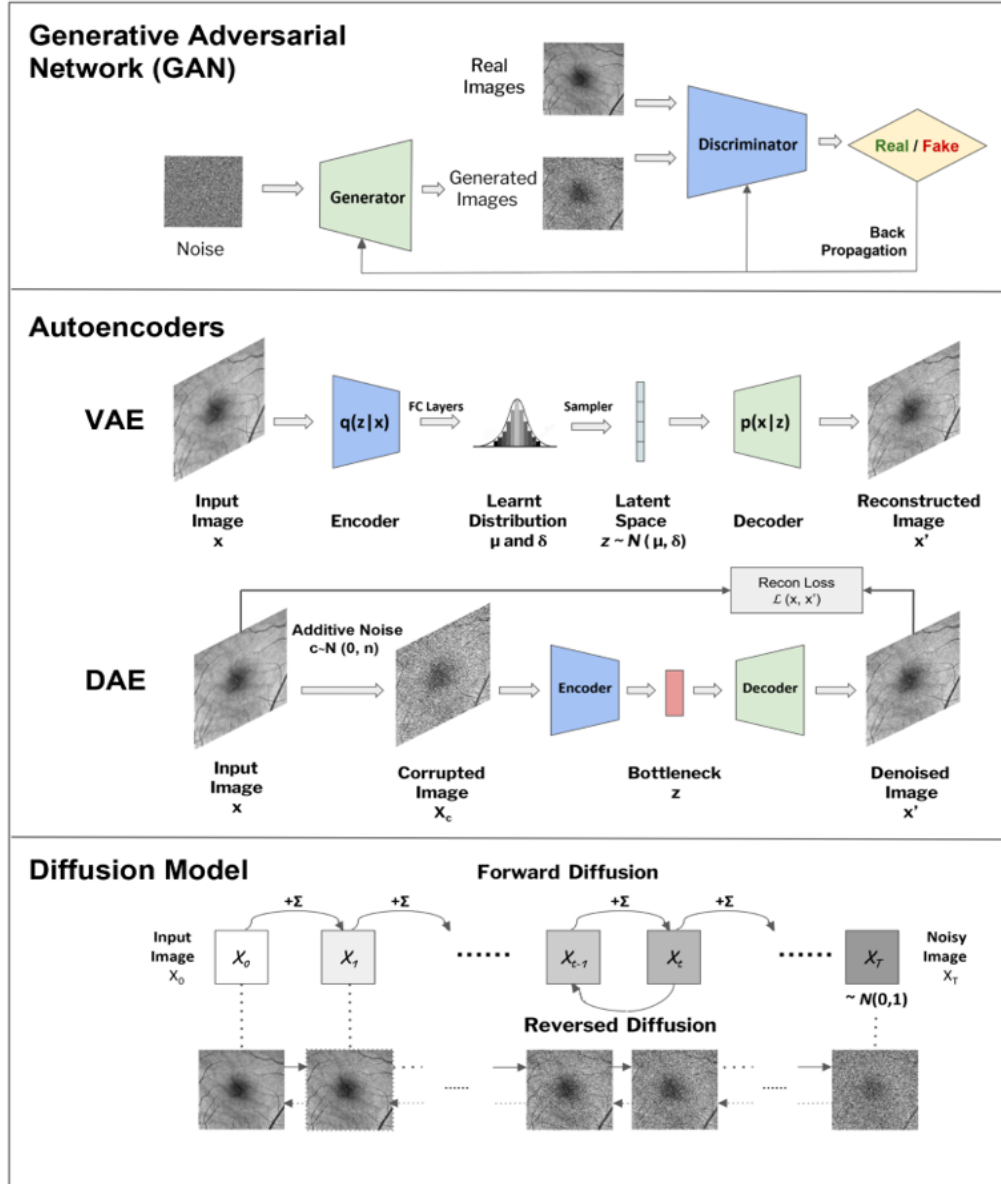

Figure 5: The depiction of three classes of image-generation AI models. From top to bottom: GAN; Autoencoders including VAE and DAE; Diffusion Model.



#### 4 A.3 Quality Score Acquisition

|               |                                                                                    |                                   |
|---------------|------------------------------------------------------------------------------------|-----------------------------------|
| 1             | 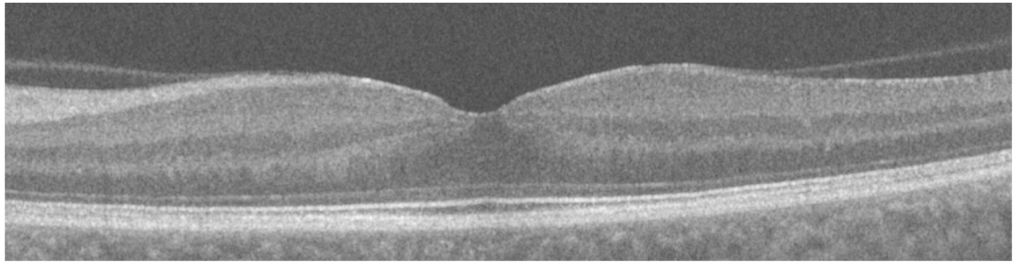 |                                   |
| <b>Score:</b> | <b>Reason (optional):</b>                                                          | High quality image, well centered |
| 9             |                                                                                    |                                   |

  

|               |                                                                                     |                                                         |
|---------------|-------------------------------------------------------------------------------------|---------------------------------------------------------|
| 2             |  |                                                         |
| <b>Score:</b> | <b>Reason (optional):</b>                                                           | Off center, cannot see nasal macula, cannot see choroid |
| 2             |                                                                                     |                                                         |

Figure 6: The slide shown to clinicians for consensus quality scores on high-resolution (target) images, which are used in regularizing the loss function. Top: an example of a scan scored 9/10; bottom: an example of a scan scored 2/10.

#### 5 A.4 Extended Ablation Study

6 The focal-style loss function with the quality score as defined in Secion 3.3 as:

$$MSE_{focal} = \frac{1}{N} \sum_{i=1}^N \left(1 - S_{quality}^{(i)}\right)^{\gamma} \cdot (x_i - \hat{x}_i)^2 \quad (1)$$

7 where  $\gamma < 0$  is a focusing parameter that controls the degree to which high-quality samples are  
8 prioritized, usually being set in  $[-2, -1]$ . The quality score  $S$  is normalized to the range  $(0,1)$ .

9 We conduct an ablation on the impact of different  $\gamma$  values on results.

Table 1: Ablation study on the focal parameter  $\gamma$ . Evaluation is on Philophos Dataset.

| $\gamma$ | $W_{S=0.2}$ | $W_{S=0.8}$ | SSIM% $\uparrow$ | PSNR $\uparrow$ |
|----------|-------------|-------------|------------------|-----------------|
| -0.5     | 1.12        | 2.24        | 88.2             | 35.1            |
| -1.0     | 1.25        | 5.00        | <b>91.8</b>      | <b>35.7</b>     |
| -2.0     | 1.56        | 25.0        | 83.9             | 34.2            |

10 When the focal parameter  $\gamma$  becomes smaller (i.e., closer to -2), the weighting effect on high-quality  
11 samples is significantly amplified. The model places much stronger emphasis on high-quality samples  
12 when  $\gamma$  is smaller. Conversely, the weights assigned to lower-quality samples increase only slightly  
13 across the range of  $(-2,0)$ . According to the comparison in table 1, we used  $\gamma = -1.15$  to get the  
14 best-performing result in the following experiments.
